# Supplementary material
Source: PubMed Central journal article supplement (PMC3874128)

# Supplementary data 1

(a)

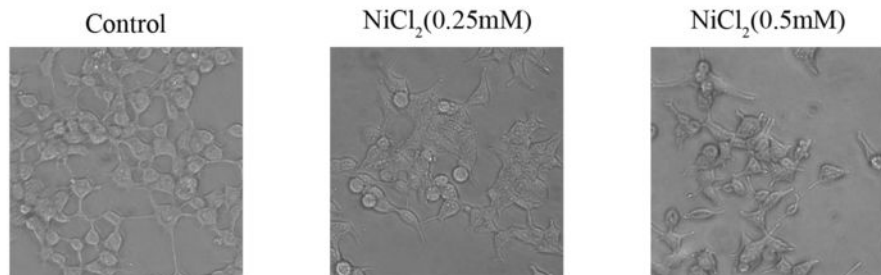

(b)

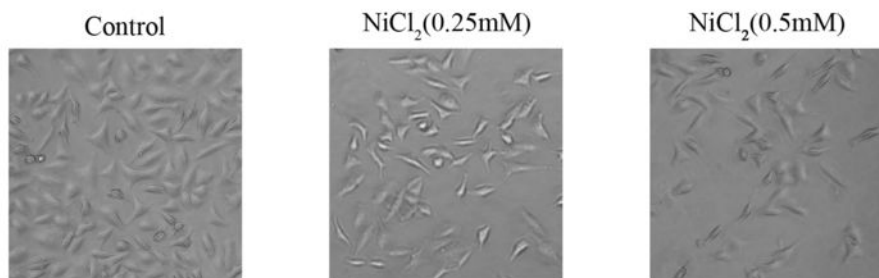

(c)

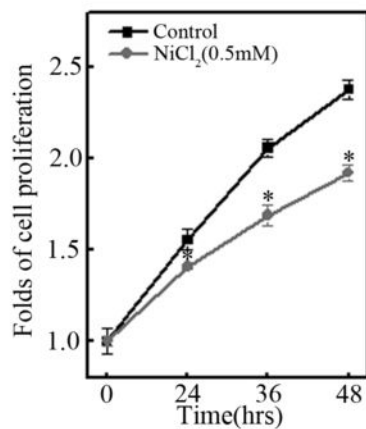

(d)

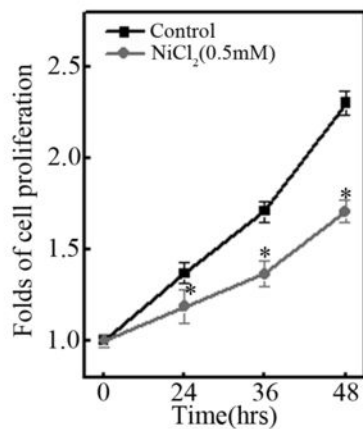

Supplement: NIHMS507072-supplement-Supplemental_Figure_1.pdf [file NIHMS507072-supplement-Supplemental_Figure_1.pdf]

# Supplementary data 2

(a)

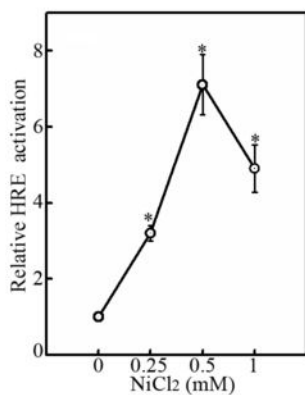

(b)

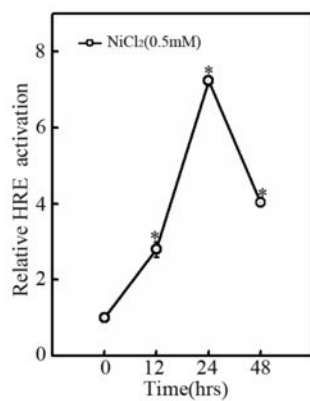

(c)

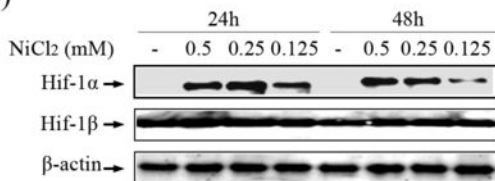

(d)

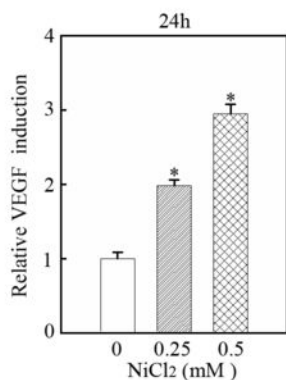

(e)

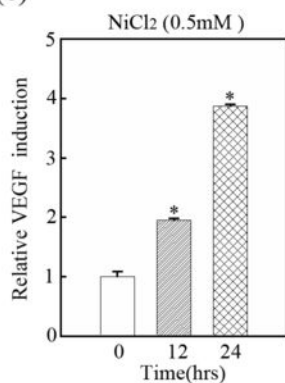

(f)

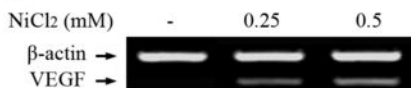

Supplement: NIHMS507072-supplement-Supplemental_Figure_2.pdf [file NIHMS507072-supplement-Supplemental_Figure_2.pdf]
